# Supplementary material for: Alleviation of myocardial infarction by hydrogen sulfide-releasing nanoparticles: mechanisms and therapeutic effects
Source: Royal Society of Chemistry journal article supplement (doi:10.1039/d5tb00672d), 2025-01-01
Supplement: d5tb00672d1.pdf [file d5tb00672d1.pdf]

## Supplementary Materials

### Alleviation of Myocardial Infarction by Hydrogen Sulfide-Releasing Nanoparticles: Mechanisms and Therapeutic Effects

Yujia Zhan,<sup>a†</sup> Xueshan Zhao,<sup>a†</sup> Ruiqi Liu,<sup>b</sup> Siwei Bi,<sup>b</sup> Yuxuan Ge,<sup>d</sup> Yin Wang,<sup>d</sup> Haibo Wang,<sup>e</sup> Lisha Jiang,<sup>c\*</sup> Jun Gu<sup>a\*</sup>

<sup>a</sup>Department of Cardiovascular Surgery, West China Hospital, Sichuan University, Chengdu, 610000, China.

<sup>b</sup>Department of Burn and Plastic Surgery, West China Hospital, Sichuan University, Chengdu, 610000, China.

<sup>c</sup>Department of Nuclear Medicine West China Hospital, Sichuan University, Chengdu, 610000, China

<sup>d</sup>Engineering Research Center of Cell & Therapeutic Antibody, Shanghai Frontiers Science Center of Drug Target Identification and Delivery, National Key Laboratory of Innovative Immunotherapy, School of Pharmaceutical Sciences, Shanghai Jiao Tong University, Shanghai 200240, China

<sup>e</sup>College of Biomass Science and Engineering, Sichuan University, Chengdu 610065, PR China

<sup>†</sup>These two authors contributed to this work equally.

\*Correspondence to: Jun Gu (Email: gujun@wchscu.cn); Lisha Jiang (Email: jianglisha@wchscu.cn).  
Jun Gu and Lisha Jiang were corresponding Authors.

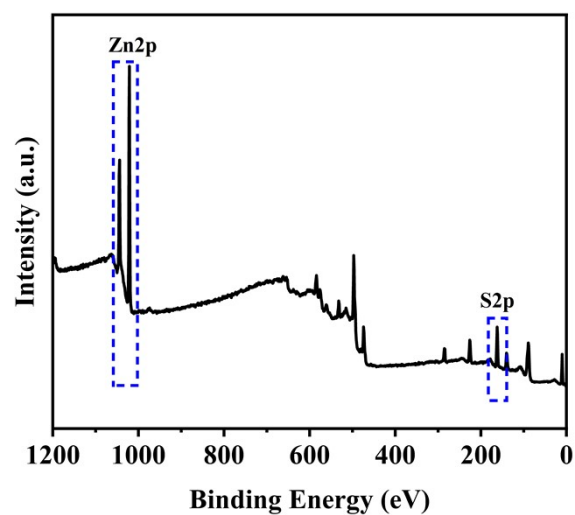

Figure S1 XPS survey spectrum of HA@ZnS nanoparticles

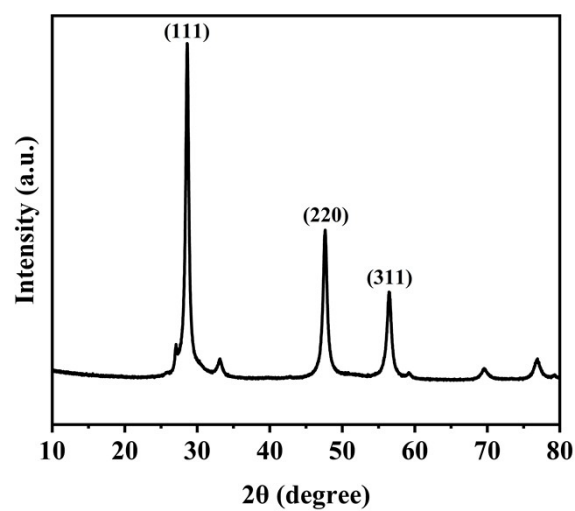

Figure S2 XRD patterns of HA@ZnS nanoparticles
